# Supplementary material for: Evaluation of real-world mepolizumab use in severe asthma across Europe: the SHARP experience with privacy-preserving federated analysis
Source: PubMed Central journal article supplement — ERJ Open Res. 2023 Apr 3;9(2):00745-2022. doi: 10.1183/23120541.00745-2022 (PMC10068512; doi:10.1183/23120541.00745-2022), 2023-04-03
Supplement: 00745-2022.FIGURES1.pdf [file 00745-2022.FIGURES1.pdf]

**A** Age at index date

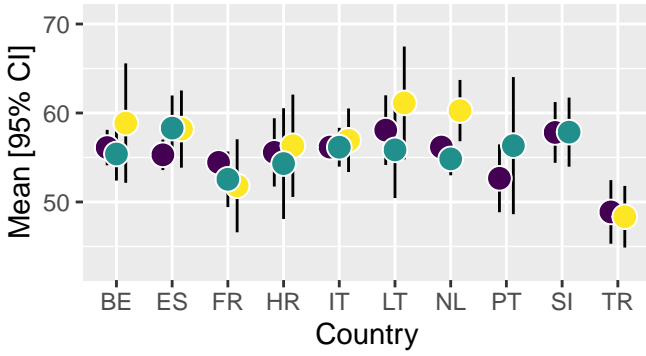

**B** Female

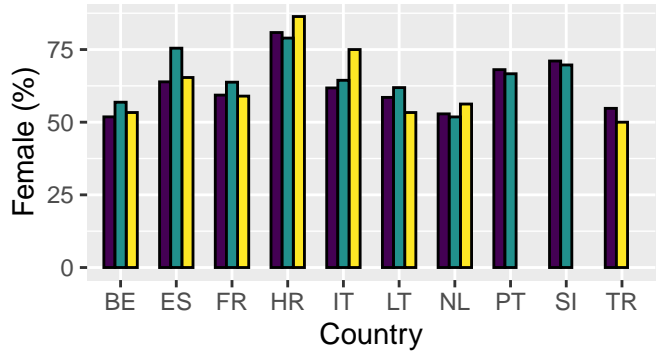

**C** BMI (kg/m2)

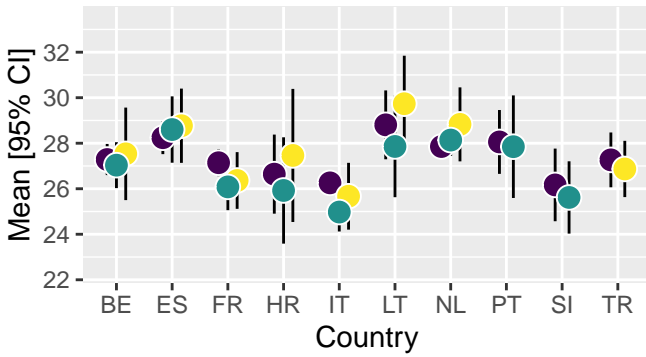

**D** Adult onset

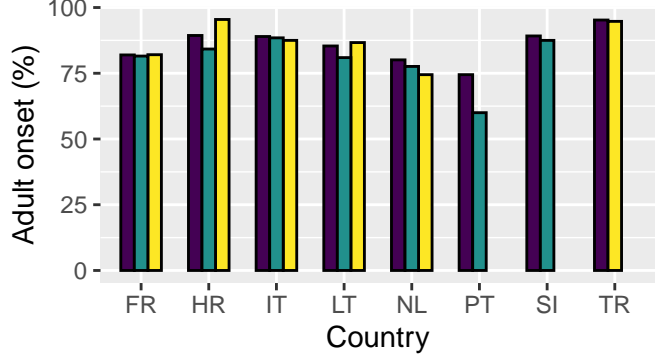

**E** Current smoker

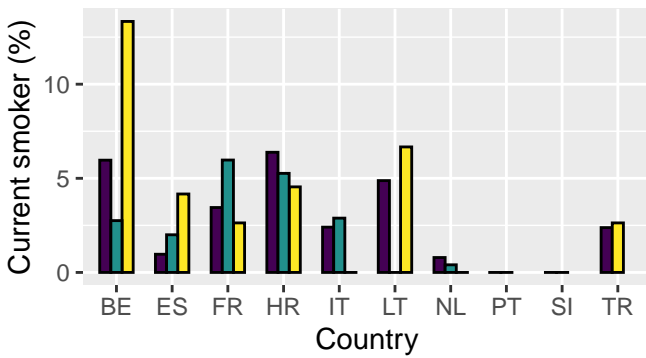

**F** Never smoked

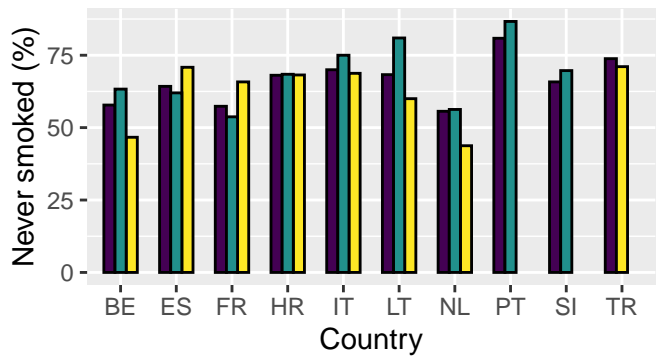

● All Mepolizumab ● PP ● Pan

**G** Pack years

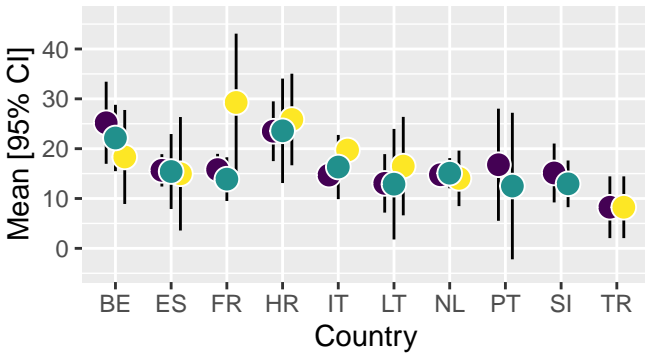

**H** Blood eosinophil count

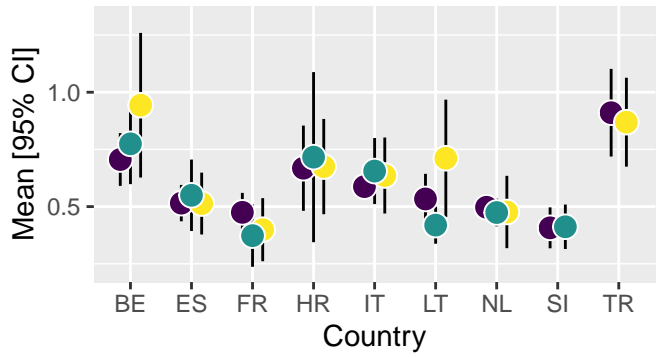

**I** Total IgE (kU/L)

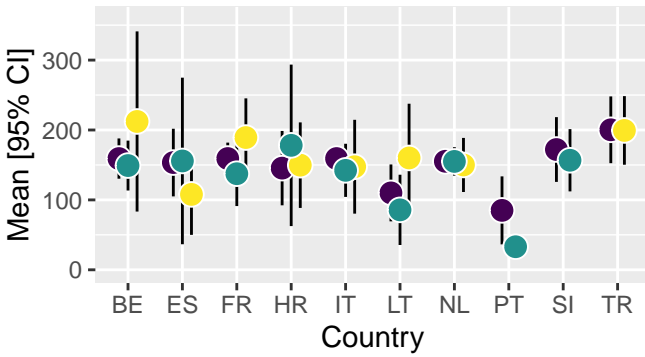

**J** Patients with  $\geq 2$  exacerbations

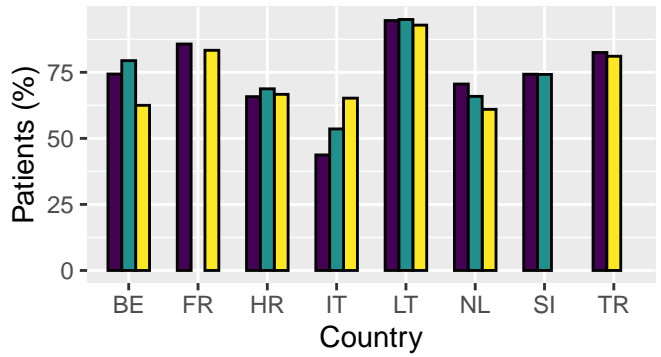

**K** OCS

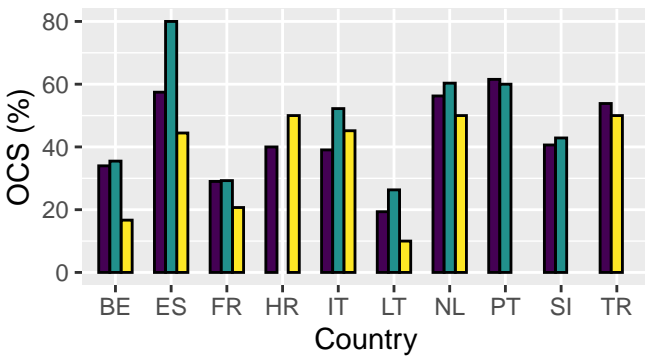

**L** Daily OCS Dose (pred eq.)

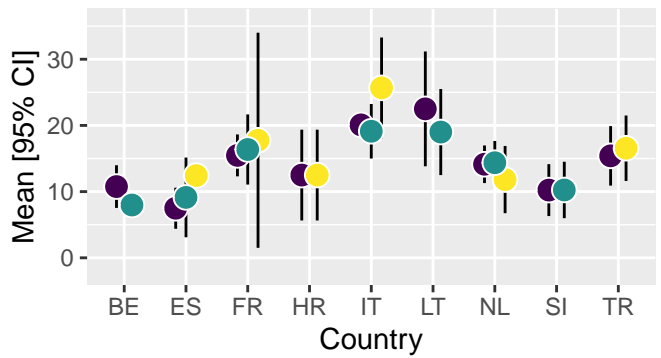

● All Mepolizumab ● PP ● Pan

**M** FEV1 pre-BD (PP)

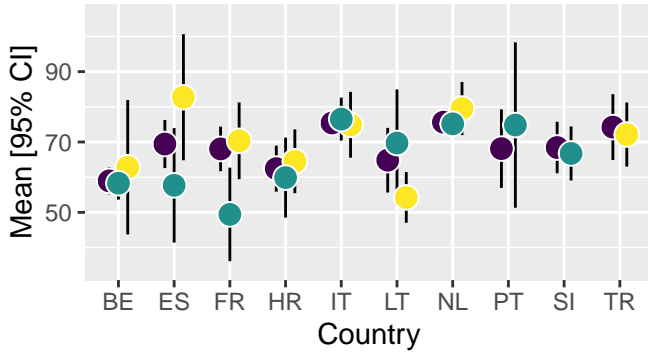

**N** FEV1 post-BD (PP)

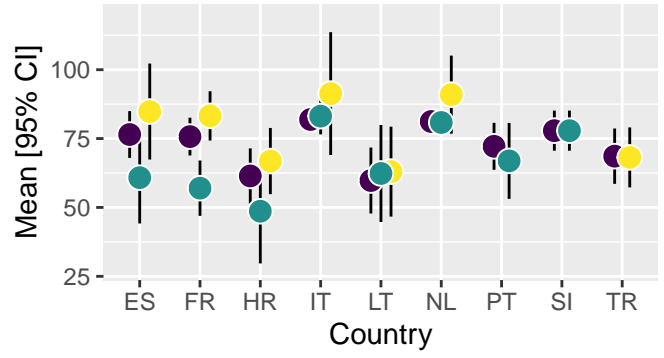

**O** FeNO (ppb)

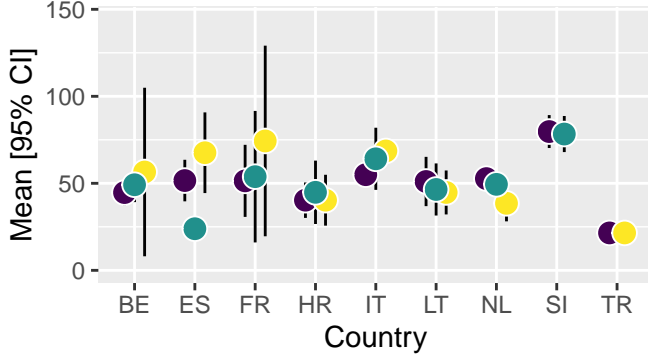

**P** Nasal polyps

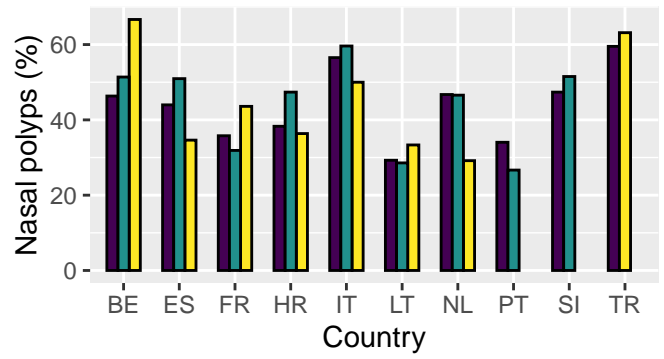

● All Mepolizumab ● PP ● Pan
