# Supplementary material for: Evaluation of real-world mepolizumab use in severe asthma across Europe: the SHARP experience with privacy-preserving federated analysis
Source: PubMed Central journal article supplement — ERJ Open Res. 2023 Apr 3;9(2):00745-2022. doi: 10.1183/23120541.00745-2022 (PMC10068512; doi:10.1183/23120541.00745-2022), 2023-04-03
Supplement: 00745-2022.SUPPLEMENT.pdf [file 00745-2022.SUPPLEMENT.pdf]

## **Supplementary file 1. Contributor acknowledgement list.**

### **Severe Heterogeneous Asthma Registry, Patient-centred (SHARP) steering committee**

Ratko Djukanovic (University of Southampton Faculty of Medicine, Southampton, United Kingdom)

Celeste Porsbjerg (Bispebjerg University Hospital, Copenhagen, Denmark)

Elisabeth Bel (Amsterdam University Medical Centre, Amsterdam, The Netherlands)

Dominique Hamerlijnck (European Lung Foundation)

Olivia Furton (European Lung Foundation)

Liam Heaney (Queens University Belfast, Belfast, United Kingdom)

Renaud Louis (Liege University, Liege, Belgium)

David Ramos (Hospital de la Santa Creu i Sant Pau & Biomedical Research Institute Sant Pau (IIB Sant Pau), Barcelona, Spain)

Piotr Kunar (Medical University of Lodz, Lodz, Poland)

Apostolos Bossios (Karolinska Severe Asthma Center, Solna, Sweden)

Enrico Heffler (Humanitas University Milan, Milan, Italy)

Konstantinos Samitas (Respiratory Medicine Department University Hospital of Ioannina, Ioannina, Greece)

Jacob Sont (Leiden University Medical Center, Leiden, The Netherlands)

Michael Hyland (Plymouth Marjon University, Plymouth, United Kingdom)

Sabina Skrgat (Pulmonary Department University Medical Centre Ljubljana Medical faculty, Ljubljana, Slovenia)

Omar Usmani (National Heart & Lung Institute Imperial College London, London, United Kingdom)

### **Belgium**

Renaud Louis, Florence Schleich (Department of Respiratory Medicine, CHU Liège, Sart-Tilman, Liège)

UZ Gent: Guy Brusselle, Guy Joos (Department of Respiratory Medicine, Ghent University Hospital, Ghent)

Lieven Dupont (Department of Respiratory Medicine, Katholieke Universiteit Leuven, Leuven)

Rudy Peche (Department of Respiratory Medicine, CHU-Charleroi, A. Vésale Hospital, Charleroi)

Charles Pilette (Cliniques Universitaires St-Luc and institute of Experimental and Clinical Research, Université Catholique de Louvain, Brussels)

Olivier Vandenplas (Department of Respiratory Medicine, Centre Hospitalier Universitaire UCL Namur, Université Catholique de Louvain, Yvoir)

Alain Michils (Chest Department, Erasme University Hospital, Université Libre de Bruxelles, Brussels)

Shane Hanon (Department of Respiratory Medicine, UZ Brussel, Brussels)

Michel Crine (Department of Respiratory Medicine, CHR Citadelle, Liège)

## **Spain**

V. Lozoya García (Evidenze Clinical Research, Madrid, Spain)

L. Pérez De Llano (Pneumology Service. Lucus Augusti University Hospital. EOXI Lugo, Monforte, Cervo, Spain)

D. Ramos-Barbon (Hospital de la Santa Creu i Sant Pau, Barcelona, Spain)

## **France**

Cindy, BARNIG, Hôpital Jean Minjot, Besançon Cedex. Philippe BONNIAUD, Centre Hospitalier Universitaire de Dijon Bourgogne - Hôpital François Mitterrand, Dijon. Amel BOUDJEMAA, Centre Hospitalier Intercommunal Créteil, Créteil. Arnaud BOURDIN Le Centre Hospitalier Régional Universitaire de Montpellier Hôpital Arnaud de Villeneuve, Montpellier Cedex 5. Pascal CHANEZ, Hôpital Nord, Marseille. Gérard CHATTÉ, Centre de pneumologie et d'allergologie respiratoire de Caluire, Caluire-et-Cuire. Cécile CHENIVESSE, Centre Hospitalier Universitaire de Lille, Lille. Gilles DEVOUASSOUX, Hôpital de La Croix Rousse, Lyon. Toufik DIDI, Centre Hospitalier Annecy Genevois, Pringy cedex. Candice ESTELLAT, Centre de Pharmaco-épidémiologie de l'AP-HP Hôpitaux Universitaires Pitié Salpêtrière Charles Foix (AP-HP), Paris. Gilles GARCIA, Hôpital privé d'Antony, Antony. Laurent GUILLEMINAULT, Hôpital Larrey, Toulouse Cedex 9. Armine IZADIFAR, Centre Cardiologique du Nord, Saint Denis. Dany JAFFUEL, Poylclinique Saint Privat, Boujan-sur-Libron. Nicolas JUST, Centre Hospitalier de Roubaix Service de pneumologie, Roubaix. Mathieu LAROUSSE, Cabinet de pneumologie, Toulon. Cyril MAURER, Groupe Hospitalier Intercommunal Le Raincy Montfermeil, Montfermeil. Cécile OLIVIER, Clinique de la Louvière CLEFAR, Lille. Jean-Philippe OSTER, Hospices civils de Colmar Service de pneumologie, Colmar cedex. Jeanne-Marie PEROTIN COLLARD, Centre Hospitalier Universitaire de Reims, Reims Cedex. Laurent PORTEL, Centre Hospitalier de Libourne, Libourne. Arnaud PRIGENT, Groupe médical de pneumologie, Rennes. Jésus GONZALEZ, Hôpital La Pitié Salpêtrière, Paris. Nicolas ROCHE, Hôpital Cochin, Paris. Camille TAILLÉ, Hôpitaux Universitaires Paris Nord Val de Seine Hôpital Bichat Claude-Bernard, PARIS Cedex 18. Antoine MAGNAN, Hôpital Foch, Suresnes. Clairelyne DUPIN, Hôpitaux Universitaires Paris Nord Val de Seine. Hôpital Bichat Claude-Bernard, PARIS Cedex 18. Victor MARGELIDON, Centre Hospitalier Universitaire de Lille, Lille. Edouard CUVILLON, Centre Hospitalier Universitaire de Lille, Lille. Anne Sophie GAMEZ, Le Centre Hospitalier Régional Universitaire de Montpellier Hôpital, Montpellier Cedex 5. Mathilda VOLPATO, Le Centre Hospitalier Régional Universitaire de Montpellier Hôpital, Montpellier Cedex 5. Gilles MANGIAPAN, Centre Hospitalier Intercommunal Créteil, Créteil. Christel SAINT-RAYMOND, Centre Hospitalier Universitaire Grenoble, Grenoble Cedex 9. Christophe PISON, Centre Hospitalier Universitaire Grenoble, Grenoble Cedex 9. Pauline ROUX, Centre Hospitalier Universitaire Besançon

Hôpital Jean Minjot, Besançon. Antoine BEURNIER, Hôpital Bicêtre, Le Kremlin-Bicêtre. Caroline SATTler, Hôpital Bicêtre Le Kremlin-Bicêtre. Gaetan DESLEE, Centre Hospitalier Universitaire de Reims, Reims Cedex. Sandra DURY, Centre Hospitalier Universitaire de Reims, Reims Cedex. Maud RUSSIER, Centre Hospitalier d'Orléans, Orléans. Nathalie FREYMOND, Centre Hospitalier Lyon Sud – HCL, Pierre-Bénite. Elisabeth POPIN-MEYER, Centre Hospitalier Universitaire Amiens-Picardie, Amiens. Claire ANDREJAK, Centre Hospitalier Universitaire Amiens-Picardie, Amiens. Melanie DRUCBERT, Centre Hospitalier Universitaire Amiens-Picardie, Amiens. Stéphanie HABIB-MAILLARD, Hôpital Cochin, Paris.

### **Croatia**

Sanja Popović-Grle, University Hospital Centre Zagreb, Zagreb

Neven Tudorić, University Hospital Dubrava, Zagreb

Mirna Vergles, University Hospital Dubrava, Zagreb

Eugenija Kasap, Zadar General Hospital, Zadar

### **Italy**

L. Brussino (University of Turin, Turin, Italy)

C. Cardini (Severe Asthma Network in Italy (SANI), Milan, Italy)

C. Sirena (Severe Asthma Network in Italy (SANI), Milan, Italy)

E. Heffler (IRCCS Humanitas Research Hospital, Rozzano MI, Italy and Humanitas University, Pieve Emanuele MI, Italy)

### **Lithuania**

Kristina Bieksiene, Lithuanian University of Health Sciences, Kaunas

Jolita Palcionyte, Lithuanian University of Health Sciences, Kaunas

### **Netherlands**

S Hashimoto, EHD Bel, EJM Weersink, AH Maitland - van der Zee, KAB Eger, PF Mau – Asam, L van der Schaaf (Department of Respiratory Medicine, Amsterdam UMC, location AMC, University of Amsterdam, Amsterdam, The Netherlands) MJ van Bezouw (Department of Work and Organizational Psychology, University of Amsterdam, Amsterdam, The Netherlands) GJ Braunstahl (Department of Respiratory Medicine, St. Franciscus Gasthuis en Vlietland, Rotterdam, The Netherlands) A ten Brinke, AN van der Meer, G Bosma, W Kempenaar-Okkema, T Holtrop, P Hirmann (Department of Respiratory Medicine, Medical Centre Leeuwarden, Leeuwarden, The Netherlands) JA Kroes (Department of Clinical Pharmacy and Pharmacology, Medical Centre Leeuwarden, Leeuwarden, The Netherlands) JK Sont, HB Hofstee (Department of Biomedical Data Sciences, section Medical Decision Making, Leiden University Medical Centre, Leiden, The Netherlands) A Beukert, B Langeveld, S Teunisse, S Grondman (Department of Respiratory Medicine, Deventer Ziekenhuis, Deventer, The Netherlands) FWJM

Smeenk, A Aldenkamp, P Wielders (Department of Respiratory Medicine, Catharina Hospital, Eindhoven, The Netherlands) KW Patberg, L Hulstein, M Haagen (Department of Respiratory Medicine, ISALA Clinics, Zwolle, The Netherlands) SA Bendien, J van Exsel (Department of Respiratory Medicine, Haga Teaching Hospital, Den Haag, The Netherlands) IHPAA van Veen, LM Imming, C Bergman (Department of Respiratory Medicine, Medisch Spectrum Twente, Enschede, The Netherlands) MJT van de Ven, EAPM Romme (Department of Respiratory Medicine, Rijnstate Hospital, Arnhem, The Netherlands) MEAC Broeders (Department of Respiratory Medicine, Jeroen Bosch Hospital, 's Hertogenbosch, The Netherlands) A van Veen, B Hulsen, K Hoppenbrouwers (Department of Respiratory Medicine, Canisius Wilhelmina Ziekenhuis, Nijmegen, The Netherlands) E van Velzen, MT Winnubst-Wassen (Department of Respiratory Medicine, Meander Medical Centre, Amersfoort, The Netherlands) K Oud (Department of Respiratory Medicine, Ziekenhuis Gelderse Vallei, Ede, The Netherlands).

### **Portugal**

Ana Mendes: Alergology Unit, Hospital de Santa Maria, Centro Hospitalar Lisboa Norte, Portugal

Letícia Balanco: Pulmonology Unit, Hospitais da Universidade de Coimbra, Centro Hospitalar e Universitário de Coimbra, Portugal

Pedro Nogueira: Pulmonology Unit, Hospitais da Universidade de Coimbra, Centro Hospitalar e Universitário de Coimbra, Portugal

### **Slovenia**

Sabina Škrbat, University Clinical Center Ljubljana, Ljubljana

Frosina Markoska, University Clinical Center Ljubljana, Ljubljana

Saša Rink, University Clinical Center Ljubljana, Ljubljana

Ana Žaže Bertoncek, University Clinical Center Ljubljana, Ljubljana

Peter Kopac, University Clinic Golnik, Golnik

Mariana Rezelj, University Clinic Golnik, Golnik

### **Turkey**

G. Celik, Ankara University School of Medicine - Ankara (Turkey)

E. Damadoglu, Hacettepe University Faculty of Medicine - Ankara (Turkey)

B. Gemicioglu, Istanbul University-Cerrahpasa, Cerrahpasa Faculty of Medicine - Istanbul (Turkey)

O. Goksel, Ege University, Faculty of Medicine - Izmir (Turkey)
